# Supplementary material for: Perspectives for the association between olfactory disturbances and depression in Parkinson’s disease
Source: PubMed Central journal article supplement — Neural Regen Res. 2019 Apr;14(4):591–2. doi: 10.4103/1673-5374.247461 (PMC6352594; doi:10.4103/1673-5374.247461), 2019-04
Supplement: NRR-14-591_Suppl1.pdf [file NRR-14-591_Suppl1.pdf]

## PEER-REVIEW REPORT

**Name of journal:** Neural Regeneration Research

**Manuscript NO:** NRR-D-18-00645

**Title:** Perspectives for the association between olfactory disturbances and depression in Parkinson ´s disease

**Reviewer´s Name:** Andrei Surguchov

**Reviewer´s country:** UNITED STATES

**Date sent for review:** 2018-09-19

**Date reviewed:** 2018-09-19

**Review time:** 1 day

1. Do you consider this paper is hotspots or important areas in the research field related to neural regeneration?

Yes, it is an important contribution to the area which can be considered as a hotspot

2. Which area do you think this paper falls into? Neurorepair, neuroprotection, neuroregeneration or neuroplasticity.

neuroprotection

3. Is the manuscript technically sound, and do the data support the conclusions?

it is technically sound

4. Has the statistical analysis been performed appropriately and rigorously?

N/A

5. Is the manuscript presented in an intelligible fashion and written in Standard English?

The manuscript is prepared in intelligible fashion and written in standard English

6. Your peer review comments will be published as an open peer review report. Do you agree to have your name included with the published article?

Yes

| Manuscript Rating Question(s):                                                          | Scale | Rating |
|-----------------------------------------------------------------------------------------|-------|--------|
| The subject addressed in this article is worthy of investigation. (3 as the best score) | [1-3] | 3      |
| The information presented was new. (5 as the best score)                                | [1-5] | 5      |

### COMMENTS TO AUTHORS

Review of the manuscript NRR-D-18-00645 "Perspectives for the association between olfactory disturbances and depression in Parkinson ´s disease"

Parkinson's disease is a devastating disorder for which there is no efficient disease-modifying treatment and no reliable biomarkers revealing the disease on early step. Therefore, it is important to study mood and olfactory disruptions as potential benchmarks of the early-phase disease and to investigate a possibility to use them as early-phase diagnostic tools. Thus, the manuscript is devoted to an important problem, being timely and interesting for the readership of the "Neural Regeneration Research".

The following corrections should be added

1) Lines 23-24 "Such process leads to a critical motor impairment scenario characterized by bradykinesia, rigidity, resting tremor, and postural instability" The authors should cite here a recent review on

Parkinson's disease: "Parkinson's disease: Biomarkers, Treatment, and Risk Factors". *Frontiers in Neuroscience*, 12, 61230, Aug 2018

2) Lines 28-31 "In this sense, the literature is increasingly emphasizing the importance of investigating mood and olfactory disruptions as high sensitive benchmarks of the early-phase disease". The authors should give a citation of the relevant published articles, for example, "The relevance of pre-motor symptoms in Parkinson's disease". *Expert Rev Neurother*. 2015 Oct;15(10):1205-17. doi: 10.1586/14737175.2015

3) Figure. The fonts, size of letters and symbols on part A and part B of the Figure should be the identical.

4) Lines 13-15 Conclusions and future perspectives: "Our study originally demonstrated that a dopaminergic lesion of the glomerular layer is able to produce olfactory deficits and depressive-like behaviors". The authors should describe exactly what they mean by "Our study originally demonstrated...". If they mean previous published results, they should give a citation. If the results are unpublished, they should refer to them correspondingly.
